# Supplementary material
Source: publisher figshare collection journal article supplement (https://acs.figshare.com/ndownloader/files/4365229)
Supplement: Supplementary file 1 [file 4365229]

**Supporting Online Material for**  
**Hemin-Graphene Hybrid Nanosheets with Intrinsic Peroxidase-like activity for**  
**Label-Free Colorimetric Detection of Single-Nucleotide Polymorphism**

*Yujing Guo,<sup>1a,b</sup> Liu Deng,<sup>1a</sup> Jing Li,<sup>a</sup> Shaojun Guo,<sup>a</sup> Erkang Wang<sup>a</sup> and Shaojun Dong<sup>\*a</sup>*

<sup>a</sup>State Key Laboratory of Electroanalytical Chemistry, Changchun Institute of Applied Chemistry, Chinese Academy of Sciences, Changchun 130022, Jilin, China and Graduate School of the Chinese Academy of Sciences, Beijing, 100039, P. R. China

<sup>b</sup> Research Center for Environmental Science and Engineering, Shanxi University, Taiyuan, 030006, China

Email: [dongsj@ciac.jl.cn](mailto:dongsj@ciac.jl.cn)

<sup>1</sup>Yujing Guo and Liu Deng contributed equally to this work.

**Figures**

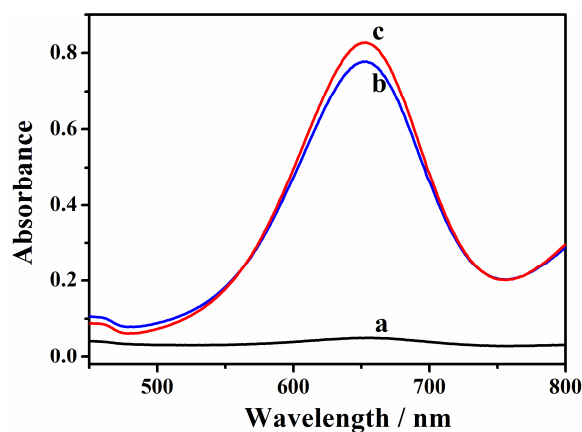

**Figure S1** Typical absorption curves of TMB (0.8 mM) reaction solutions catalytically oxidized by a. G (1  $\mu\text{g/mL}$ ); b. H-G (1  $\mu\text{g/mL}$ ) and c. Hemin (0.4  $\mu\text{g/mL}$ ) in the presence of 10 mM  $\text{H}_2\text{O}_2$  at room temperature in phosphate buffer (25 mM pH 5.0) after reaction for 10 min.

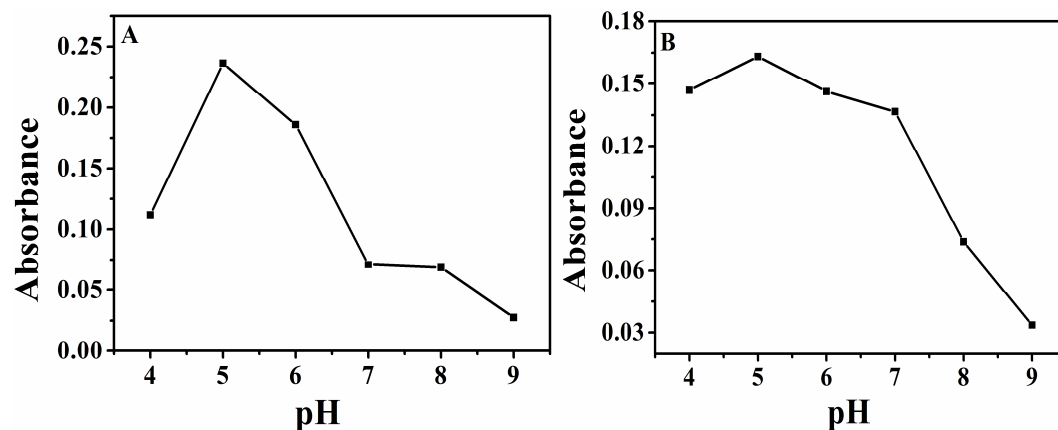

**Figure S2** The effect of pH on the peroxidase-like activity of the Hemin (A) and H-GNs (B) with 1mM ABTS as the substrate. Experiments were carried out using 0.4  $\mu\text{g/mL}$  hemin or 1  $\mu\text{g/mL}$  H-GNs in 1 mL phosphate buffer (25 mM) at room temperature. The concentration of  $\text{H}_2\text{O}_2$  was 10 mM.

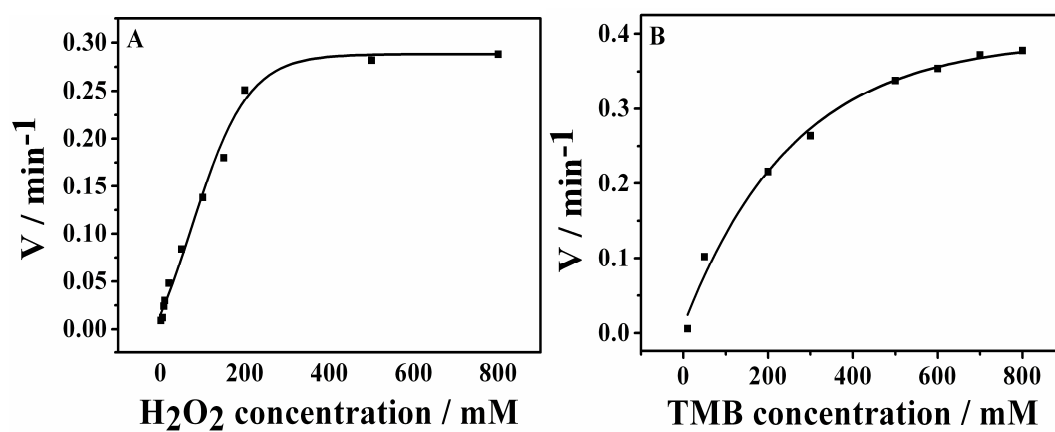

**Figure S3** Steady-state kinetic assay and catalytic mechanism of Hemin. The velocity ( $v$ ) of the reaction was measured using 0.4  $\mu\text{g}$  hemin in 1 ml of 25 mM phosphate buffer (pH 5.0) at room temperature. A) The concentration of TMB was 0.8 mM and the  $\text{H}_2\text{O}_2$  concentration was varied. B) The concentration of  $\text{H}_2\text{O}_2$  was 10 mM and the TMB concentration was varied.

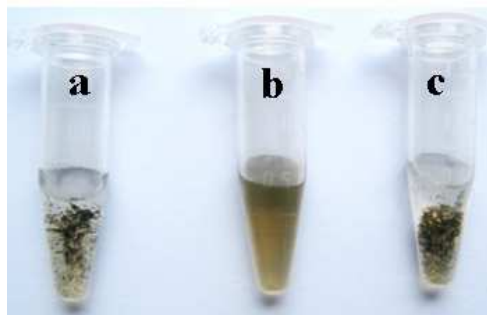

**Figure S4** Photographs of 2  $\mu\text{g}/\text{mL}$  H-GNs in 0.6 M NaCl solution: a) absence of DNA; b) presence of 200 nM ssDNA; (c) presence of 200 nM dsDNA
